# Supplementary material
Source: Springer Nature journal article supplement (https://www.springermedizin.de/resource/supplementary/12245_2010_92_MOESM2_ESM.pdf/9672748)

40dB 2 +/-1/0/1  
PW Depth= 74mm  
PW Gate= 3.0mm

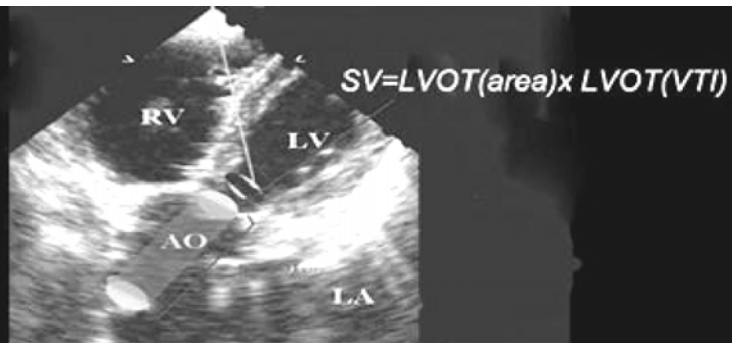

PW:2MHz

0.20

m/s

0.80

LVOT VTI

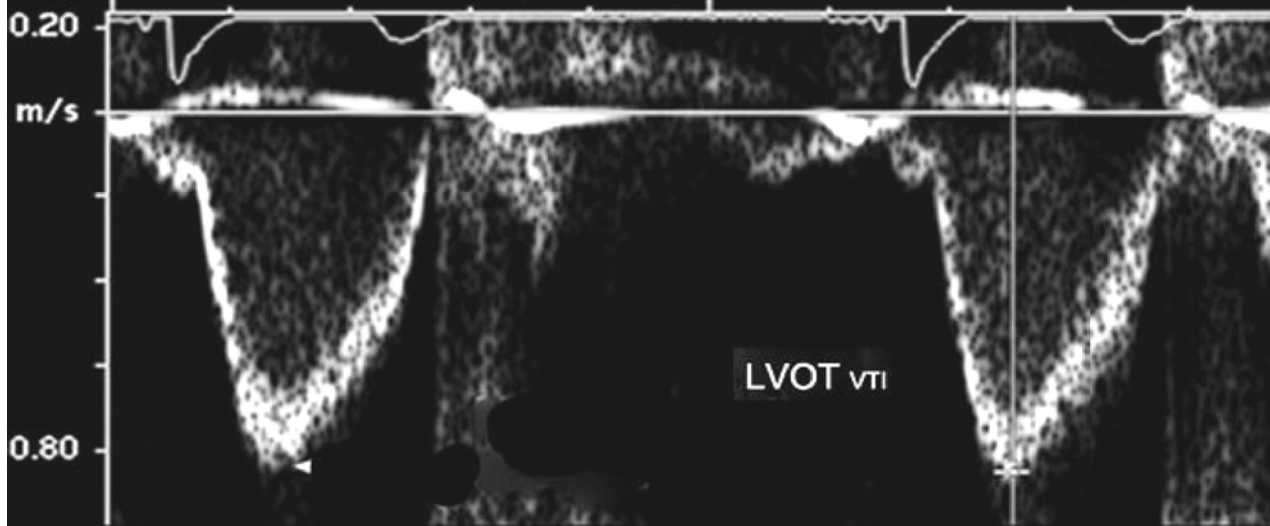

Supplement: MOESM2 [file 9672748]
